1 **Running Title:** COVID-19 serosurvey in Karachi, Pakistan

2 **Title:** Serial household serosurvey for COVID-19 in low and high transmission neighborhoods  
3 of urban Pakistan.

4 **Authors:** Muhammad Imran Nisar MBBS, MSc; Nadia Ansari MBBS, MSc; Mashal Amin  
5 BDS, MSc; Aneeta Hotwani MSc; Farah Khalid MSc; Najeeb Rehman BSc; Arjumand Rizvi  
6 MPhil; Arslan Memon MBBS, MPH; Zahoor Ahmed MBBS; Ashfaque Ahmed MBBS; Junaid  
7 Iqbal PhD; Ali Faisal Saleem MBBS, MSc; Uzma Bashir Aamir MBBS, PhD; Daniel B  
8 Larremore PhD; Bailey Fosdick PhD; Fyezah Jehan MBBS, MSc

9 **Affiliations:**

10 The Aga Khan University, Karachi, Sind, Pakistan (MI. Nisar, N. Ansari, M. Amin, A. Hotwani,  
11 F. Khalid, N. Rahman, A. Rizvi, J. Iqbal, AF. Saleem, F. Jehan)

12 Health Department, Government of Sind, Karachi, Pakistan (A. Memon, Z. Ahmed, A. Ahmed)

13 World Health Organization Country Office, Karachi, Sind, Pakistan (UB. Aamir)

14 University of Colorado, Boulder, Colorado, USA (DB. Larremore)

15 Colorado State University, Fort Collins, Colorado, USA (B. Fosdick)

16

17 **Abstract-** 150 words

18 Serial household antibody sero-surveys informs the pandemic where testing is non-  
19 uniform. Young populations with intergenerational co-residence may have different transmission  
20 dynamics. We conducted two serial cross-sectional surveys in April and June 2020 in low- and  
21 high-transmission neighborhoods of Karachi, Pakistan, using random sampling. Symptoms were  
22 assessed and blood tested for antibody using chemiluminescence. Seroprevalence was adjusted  
23 using Bayesian regression and post stratification. CRI with 95% confidence intervals was  
24 obtained. We enrolled 2004 participants from 406 households. In June 8.7% (95% CI 5.1-13.1)  
25 and 15.1% (95% CI 9.4 -21.7) were infected in low- and high-transmission-areas respectively  
26 compared with 0.2% (95% CI 0-0.7) and 0.4% (95% CI 0 - 1.3) in April. Conditional risk of  
27 infection was 0.31 (95% CI 0.16-0.47) and 0.41(95% CI 0.28-0.52) in District Malir & District  
28 East respectively with overall only 5.4% symptomatic. Rapid increase in seroprevalence from  
29 baseline is seen in Karachi, with a high probability of infection within household.

30 **Keywords:** Seroepidemiologic Studies; Coronavirus; Pakistan

31

32

33

34

35

36

37

38 **Text-2541 words**

39 **INTRODUCTION**

40 The global COVID-19 pandemic has resulted in more than 27 million confirmed cases  
41 (until September 07) and more than 883,000 deaths, with an estimated case fatality rate (CFR) of  
42 3.27% % [1]. Pakistan was among the first of low- and middle- income countries (LMICs) to be  
43 affected, and since then, there have been 298,903 cases with 6345 deaths (CFR 2.1 %) [2].  
44 Karachi, a large metropolitan city became the epicenter of epidemic on 26<sup>th</sup> Feb 2020. Since  
45 then, Karachi has seen the largest number of cases (~83000 or 31% of all cases) in Pakistan.

46 The population demographics of Pakistan are typical of most LMICs with over 65%  
47 younger than 30 years of age, nuclear families with intergenerational co-residence and average  
48 household sizes of 6 or greater. Karachi, has been a hotbed for COVID-19 infections in the  
49 country. Crowded neighborhoods, urban slum dwellings and poor adherence to social distancing  
50 measures add to the dynamics of infection transmission. Similar to other countries, the pandemic  
51 is monitored through symptom-based surveillance, but supply (equipment, reagents, and  
52 nasopharyngeal-swabs) and demand side issues ( stigma and fear) limit its effectiveness along  
53 with undetected pre-symptomatic and asymptomatic transmission [3].

54 In this milieu, population-based sero surveys can be ideal [4, 5] however high quality  
55 population based surveys may not be feasible in an ongoing pandemic because they mandate  
56 training on personal protective equipment (PPE) for data collectors and allaying fear or anxiety  
57 in potential participants to avoid non-response bias. Sampling entire households can ease

58 procedures of data and blood collection and provide an opportunity to study transmission at  
59 household level especially when lockdown and social distancing measures are in place.

60 Household transmission is a concern in closed congested neighborhoods of metropolitan  
61 cities when lockdown measures are in place. It is also of importance because of intergenerational  
62 co-residence of young and old, especially in light of recent evidence indicating that households  
63 with individuals >60 years of age are at risk of more severe disease[6]. Secondary transmission  
64 from index cases in households using prospective follow up and active symptom monitoring with  
65 nasopharyngeal polymerase chain reaction (NP-PCR) has indicated household attack rates as  
66 high as 32.4% (95% CI 22.4%–44.4%) [7]. However the exercise is resource intensive and  
67 transmission may differ between symptomatic and asymptomatic households, as symptomatic  
68 individuals are more likely to transmit the virus [8-11]. In a seroprevalence data where  
69 household transmission cannot be determined, the conditional risk of infection (CRI), namely,  
70 the probability that an individual in a household is infected given that another household member  
71 is infected, can serve as a related index of infection within household.

72 With this approach, we estimated changes in seroprevalence in low- and high-  
73 transmission neighborhoods of Karachi between April and June 2020 and compared the  
74 seroprevalence to total reported positive tests in the area to understand the adequacy of reporting  
75 from NP-PCR testing. We also determined age - gender stratified estimates of seroprevalence  
76 and assessed the conditional risk of infection (CRI) by adapting the World Health Organization  
77 (WHO) Unity protocol[12].

## 78 **MATERIALS and METHODS**

### 79 **Study Participants and sample collection**

80           We conducted the study in two areas. Four sub-administrative units (union councils) of  
81 District East were purposely selected as high-transmission area based on highest number of cases  
82 to date. One union council of District Malir was selected, where case reporting had been poor  
83 and only 164 NP-PCR tests had been done until June 2020 of which 4 were positive, was  
84 designated as a low-transmission area (Figure 1).

85           Two serial cross-sectional surveys were performed at the household level, between April  
86 15-25 and June 25- July 11, 2020. Four teams, comprising of one data collector and one  
87 phlebotomist each conducted the survey. A detailed list of cases was available in District East  
88 which allowed households to be selected through systematic random sampling as follows:  
89 Reference point was identified randomly from the list of current positive cases and spinning a  
90 bottle or pen indicated direction. The reference household with the positive case did not take part  
91 in the survey, instead every nth household was sampled based on second to last digit of a bank  
92 note until the lane ended in which case the team moved to the next lane or until the day was  
93 completed. Same sampling strategy was repeated daily until the overall sample size of the survey  
94 was achieved. In case of refusal from a household, the household on the right was sampled.  
95 Household level approval and individual participant written informed consent or assent was  
96 obtained. A slightly different approach was adapted in District Malir where a list of active cases  
97 was not available but a line listing of households from demographic surveillance [13] allowed  
98 simple random sampling to be used for household identification daily until the sample size was  
99 achieved. In both areas, all household members were eligible to participate irrespective of their  
100 infection status.

101           All team members were trained in use of PPE, hand hygiene, disinfection techniques and  
102 safe transportation of biological samples. A 3 ml sample of blood from infants and 5 ml from

103 those older than 1 year was collected by a trained phlebotomist and transported to the Infectious  
104 Diseases Research Lab for centrifugation, serum separation and storage at  $-20^{\circ}\text{C}$ . Demographic  
105 and clinical data were collected using the adapted survey instrument from the WHO Unity  
106 Protocol for sero-epidemiology survey of COVID-19 [4].

### 107 **Laboratory analysis**

108 A commercial Elecsys® Anti-SARS-CoV-2 immunoassay (Roche Diagnostics), targeting  
109 both IgG and IgM against SARS-CoV-2 was performed at the Nutritional Research Laboratory  
110 (NRL) at Aga Khan University. The manufacturer reports a specificity greater than 99.8% and  
111 sensitivity of 100% for individuals with a positive PCR test at least two weeks prior, and 88.1%  
112 sensitivity for those 7-13 days post a PCR positive test [14]. The assay was optimized at the NRL  
113 on 20 stored sera from before 2019, and 25 newly collected sera from RT-PCR-confirmed  
114 COVID-19 cases. All 20 pre-pandemic sera were negative while 5 of 25 sera from cases were  
115 negative.

## 116 **STATISTICAL ANALYSIS**

### 117 **Sample Size**

118 The sample size for each phase of the survey per site was 500, totalling 1000 participants  
119 per survey. This allowed us to estimate an age adjusted prevalence for each site from 20-30 % at  
120 95 % confidence with precision of  $\pm 5\%$  and a design effect of 1.5 for household level clustering.

### 121 **Data Management**

122 All data was double entered on an SQL database and checked for completeness and  
123 consistency. Information was collected on age, gender and household size was collected along  
124 with occupation, history of travel and contact. Reported comorbidities, presence of symptoms,

125 care seeking and hospitalization were recorded. Age was presented as mean and standard  
126 deviations (SD) and also categorized. For symptoms, history was taken regarding presence of  
127 fever, respiratory symptoms such as sore throat, shortness of breath, chest pain etc. in previous  
128 two months (Supplemental Appendix 3). Occupation was recoded to create a category of those  
129 working outside home and not. Those reporting fever or respiratory symptoms in the last two  
130 months were categorized as symptomatic and presented as proportions.

### 131 **Estimation of overall, age and gender stratified seroprevalence**

132 Age and gender-stratified seroprevalence estimates were computed using a Bayesian  
133 hierarchical regression model. This approach, described in detail in the Supplementary Material,  
134 accounts for uncertainty due to finite lab validation data,[15] and produces estimates with  
135 uncertainty across age and gender groups using typical choices of uninformative or weakly  
136 informative prior distributions[16, 17].

137 Seroprevalence estimates were computed for each district and each survey phase  
138 independently, and all seroprevalence estimates are expressed as posterior means and 95% equal-  
139 tailed credible intervals based on 20000 samples from the Bayesian posterior distribution. All  
140 calculations were performed in R and samples from the posterior distributions were obtained  
141 using Stan [18].

### 142 **Household conditional risk of infection (CRI) analysis**

143 CRI, the probability that an individual in a household is infected, given that another  
144 household member is infected[19] was estimated. CRI is presented as a fraction whose  
145 numerator is the total number of ordered pairs among infected individuals in the same household  
146 and whose denominator is the total number of ordered pairs in the same household in which the

147 first individual in the pair is infected. A 95% confidence interval was estimated via bootstrap for  
148 each area by resampling households with replacement.

## 149 **Results**

150 A total of 2004 participants were enrolled across two phases from District East and  
151 District Malir. Figure 2 Panel A and B describe the flow of participants. There were high refusal  
152 rates in both the areas at the household level, 68% and 43% in district East and 44% and 42% in  
153 district Malir participated in phase one and two respectively. The GIS location of refused and  
154 accepted households is presented in supplement figure in appendix. Among households who  
155 agreed to take part, individual participation rate was 82.3% (1000 out of 1215 household  
156 members eligible) in phase 1 and 76.5% (1004 out of 1312 household members eligible) in phase  
157 2. Table 2 describes the baseline demographic and clinical characteristics of the enrolled  
158 participants.

159 In Phase 1 of the study, only 2 of 500 samples tested positive in District East and 0 of 500  
160 tested positive in District Malir. In Phase 2 of the study, 100 of 500 samples (20.0%) tested  
161 positive in District East and 64 of 504 samples (12.7%) tested positive in District Malir. Both  
162 districts showed marked and significant increase in seroprevalence between time points. Overall  
163 reporting of symptoms was low, 5.7% only. Of the total 166 participants who tested positive,  
164 only 9 (10.2 %) gave a history of fever or respiratory symptoms or both in the last 2 months  
165 (Supplemental Table)

166 To measure whether individuals in the same household were more likely to have similar  
167 sero-status, we computed the conditional risk of infection (CRI) for phase two. CRI estimates  
168 were 0.41 (95% CI 0.28-0.52) in District East and 0.31 (95% CI 0.16-0.4) in District Malir.



169           Given the correlation among household seropositivity values, we estimated  
170 seroprevalence via a Bayesian regression model (see Methods) which took into account  
171 household membership, age, and gender for each individual. We adjusted for test accuracy by  
172 modeling directly on the the lab validation data reported by the test manufacturer[14].  
173 Seroprevalence estimates by age and gender were then post stratified to adjust for the  
174 demographic makeup of the respective district.

175           In Phase 1, post-stratified seroprevalence was estimated to be 0.4% (95% CI 0%-1.3%) in  
176 District East and 0.2% (95% CI 0%-0.7%) in District Malir. In Phase 2, post-stratified  
177 seroprevalence was estimated to be 15.1% (95% CI 9.4%-21.7%) in District East, and 8.7%  
178 (95% CI 5.1%-13.1%) in District Malir. The rise in seroprevalence in district East corresponded  
179 with the epidemiology as ascertained through daily case reporting in the district as well as the 4  
180 study sampling sites. (Figure 2). Seropositivity rates were indistinguishable between male and  
181 female within each district as well as between age groups as seen in Figure 3.

## 182 **Discussion**

183           The two serial serosurveys conducted in in low- and high- transmission neighborhoods of  
184 the largest metropolitan city of Pakistan indicate a rapid increase in seroprevalence rates  
185 between April and June. We are unable to comment on the differences between the two  
186 neighborhoods based on the differential sampling methodologies but have shown an independent  
187 steep rise in seroprevalence in both high and low transmission neighborhoods of Karachi,  
188 correlating with the rise of the epidemic in District East (Figure 4). Data for district Malir was  
189 not available for comparison but verbal reports shared by the District Health Office indicated that  
190 there were only 4 positive cases out of only 164 tested until the period of the second survey. The

191 low number of tests as well as the positivity are likely a result of incomplete reporting and  
192 surveillance.

193 The survey did not identify any difference in seroprevalence between males and females  
194 or age categories. Although prevalence appeared to be increasing with age with the greatest  
195 probability at extremes of age, the 95% confidence intervals overlapped. Age related prevalence  
196 of SARS-CoV2 has been variably reported[20] but the age patterns seen in our study are fairly  
197 consistent with other studies[21]. While seroprevalence appeared to be similar, age and gender  
198 related reporting of cases as demonstrated in District East, mortality was much higher (Figure 4)  
199 showing that the illness is more severe in elderly males [22-24].

200 To our knowledge, our study is the first published seroprevalence study in Pakistan and  
201 South Asia, with available baseline rates of seroprevalence for comparison. Other national level  
202 serosurveys in Pakistan and other South Asian countries are ongoing. Preliminary reports of  
203 seroprevalence from other metropolitan areas in low- middle- income neighborhoods in Mumbai  
204 and Pune have shown very high rates of seroprevalence, up to 55% with cases and deaths at a  
205 high[25], while a survey carried out in Guilan province, Iran showed a prevalence of 33% at the  
206 height of its epidemic phase [24, 26]. In contrast, the epidemic in Karachi appears to be on a  
207 decline even at the relatively low seroprevalence rates seen in our study. While presence of  
208 antibodies cannot be equated to presence of protection, this differential in seroprevalence in  
209 context with the stage of pandemic in the three cities attributes to some uncertainty about the  
210 threshold for herd immunity[27]. It also requires that a closer look be taken at population  
211 demographics, dwelling type (concrete or other) and slum setting (urban or periurban) when  
212 comparing the geographical differences in COVID-19 cases, deaths and incidence. The first  
213 phase of the study was done early on in the pandemic 3 weeks after a provincial lockdown. A

214 higher proportion of the participants reported to be working outside home during this phase as  
215 compared to phase 2, however there was no difference in seropositivity seen between those  
216 working outside home from those not working. The second phase was conducted after lockdown  
217 measures were eased in anticipation of the religious festival of Eid. This reaffirms the efficacy of  
218 lockdown measures especially when implemented at the beginning of a pandemic when a novel  
219 infection introduced into a naïve population is highly transmissible.

220 Our survey found a large number of asymptomatic sero-positives, only 1 out of 10  
221 reported any respiratory symptoms, with or without fever. The proportion of asymptomatic  
222 infections is reported to be much lower, 27.7% (95% CI, 16.4%–42.7%) in published meta  
223 analysis[28]. However high rates of asymptomatic infection have also been reported in India. As  
224 per WHO and the Indian Council of Medical Research (ICMR), India, the asymptomatic cases  
225 appear to be about 80% compared to the 20% that are symptomatic [29]. Low symptomatology  
226 may be related to fear of disclosure or can be genuine and can contextualize why healthcare  
227 resources were not inundated in Pakistan.

228 The elevation in seroprevalence even in an area of presumably low transmission indicates  
229 that seroprevalence studies may serve as effective and low cost tools to determine spread of  
230 infection in populations where disease is mostly asymptomatic, ascertainment is low due to fear  
231 of diagnostic testing or where access to testing is poor[30]. Monitoring such populations through  
232 serial serosurveys can detect resurgence especially when lockdown is eased and scarce resources  
233 are moved away from active surveillance and contact tracing. Heterogeneity between low and  
234 high income neighborhoods is likely and has been suggested previously [31-33]. This cannot be  
235 conceded from our study because we had a different sampling strategy in the two neighborhoods.  
236 Census data for households in order to do simple random sampling was available only for

237 District Malir. In absence of such data, we employed systematic random sampling in District  
238 around a reference household, reporting a case in the last 2 months. This may overestimate  
239 absolute seroprevalence in District East but is still useful to see a temporal comparison of  
240 seroprevalence within the Districts independently.

241 Our results also confirm that close contact within households have a high probability of  
242 being infected and should be an important consideration in SARS-CoV2 transmission,  
243 especially in areas where there is lockdown and large families are roomed-in in small poorly  
244 ventilated spaces, typical of the neighborhoods of Karachi [34]. The probability of an individual  
245 to have an infection in the presence of another infected household member in our study, as  
246 measured by conditional risk of infection (CRI), was high between 35% - 40%. Secondary attack  
247 rate, which is a more reliable indicator of within household transmission, is reported to be lower,  
248 18.8% (95% CI 15.4%-22.2%) in an unpublished review [35]. CRI can function as a substitute in  
249 situations where comprehensive surveillance and disease notification strategy is absent and  
250 secondary attack rates are difficult to estimate.

251 The strength of our study is knowledge of baseline seropositivity absent in most  
252 serosurveys and the serial nature with a two month inter survey interval allowing for a study of  
253 change in seroprevalence. A third round of survey was done in August 2020. About one third or  
254 more of our sample included children less than 18 years of age focusing on an understudied age  
255 group in the pandemic. Adaptation of the UNITY protocol would allow for pooling of our results  
256 with other reports in future. The Electro Chemi Luminescence (ECL) technology used to test  
257 antibodies is sensitive and precise as per manufactures report [14].

258           Our study had several limitations. The geographical area of the study was limited and the  
259 sampling strategy different, not allowing for comparisons between geographies. We had high  
260 rates of household level refusal given that the study was conducted in the midst of a pandemic  
261 when sentiments of fear and stigma were at a high. We did not do an in-house validation on local  
262 samples due to a limited supply chain of testing kits in Pakistan, however this was somewhat  
263 compensated by modeling directly on the data reported by the manufacturer.

## 264 **Conclusion**

265           There is a rapid increase in seroprevalence to SARS-CoV-2 even in areas where  
266 transmission is reportedly low. Most seropositives are reported to be asymptomatic and a  
267 majority of the population is still seronegative. There is high probability of an individual to be  
268 infected given exposure to another infected in the household, irrespective of symptoms.  
269 Enhanced surveillance activities of COVID-19 are required especially in low-transmission sites  
270 in order to determine the real direction of the pandemic and the risks of household transmission  
271 in tightly knit neighborhoods in urban LMIC settings.

272

273 **Funding:** This study was supported by the Infectious Disease Research Laboratory(IDRL) at the  
274 Aga Khan University in Karachi, Pakistan.

### 275 **Acknowledgments**

276 The authors would like to acknowledge all the data collectors, phlebotomists and laboratory  
277 personnel who made this happen in the most difficult of circumstances.

### 278 **Author Bio**

279 Dr Fyezah Jehan is an Associate Professor and an Infectious Diseases Specialist in the  
280 Department of Pediatrics and Child Health at The Aga Khan University.

281 **Address for correspondence:** Fyezah Jehan, Associate Professor, Department of Paediatrics  
282 and Child Health, Aga Khan University, Stadium Road, Karachi 74800, Pakistan; Email:  
283 [Fyezah.jehan@aku.edu](mailto:Fyezah.jehan@aku.edu); Tel: +92 21 3486 4981

284 **Financial Disclosure:** None of the authors have any financial interest to disclose.

285

## 286 **References**

- 287 1. University JH. COVID-19 Dashboard by the Center for Systems Science and Engineering (CSSE) at Johns  
288 Hopkins University (JHU). Available at: <https://coronavirus.jhu.edu/map.html> Accessed 24/7/2020 2020.
- 289 2. Pakistan Go. COVID-19 Health Advisory Platform by Ministry of National Health Services Regulations  
290 and Coordination. Available at: <https://covid.gov.pk/stats/pakistan>. Accessed 24/7/2020 2020.
- 291 3. Verity R, Okell LC, Dorigatti I, et al. Estimates of the severity of coronavirus disease 2019: a model-  
292 based analysis. *The Lancet infectious diseases* **2020**.
- 293 4. Organization WH. Population-based age-stratified seroepidemiological investigation protocol for  
294 coronavirus 2019 (COVID-19) infection, 26 May 2020: World Health Organization, **2020**.
- 295 5. Winter AK, Martinez ME, Cutts FT, et al. Benefits and challenges in using seroprevalence data to  
296 inform models for measles and rubella elimination. *The Journal of infectious diseases* **2018**; 218:355-64.
- 297 6. Aparicio A GS. Intergenerational Residence Patterns and COVID-19 Fatalities in the EU and the US.  
298 DISCUSSION PAPER SERIES. Bonn. Germany: IZA – Institute of Labor Economics, **2020**.
- 299 7. Wu J, Huang Y, Tu C, et al. Household Transmission of SARS-CoV-2, Zhuhai, China, 2020. *Clinical*  
300 *Infectious Diseases* **2020**.
- 301 8. Lavezzo E, Franchin E, Ciavarella C, et al. Suppression of a SARS-CoV-2 outbreak in the Italian  
302 municipality of Vo'. *Nature* **2020**:1-.
- 303 9. Gudbjartsson DF, Helgason A, Jonsson H, et al. Spread of SARS-CoV-2 in the Icelandic population. *New*  
304 *England Journal of Medicine* **2020**.
- 305 10. Ferretti L, Wymant C, Kendall M, et al. Quantifying SARS-CoV-2 transmission suggests epidemic  
306 control with digital contact tracing. *Science* **2020**; 368.
- 307 11. Streeck H, Schulte B, Kuemmerer B, et al. Infection fatality rate of SARS-CoV-2 infection in a German  
308 community with a super-spreading event. *medrxiv* **2020**.
- 309 12. Organization WH. Coronavirus disease (COVID-19) technical guidance: The Unity Studies: Early  
310 Investigations Protocols. Available at: Coronavirus disease (COVID-19) technical guidance: The Unity  
311 Studies: Early Investigations Protocols. 2020.
- 312 13. Ilyas M, Naeem K, Fatima U, et al. Profile: health and demographic surveillance system in peri-urban  
313 areas of Karachi, Pakistan. *Gates Open Research* **2018**; 2:2.
- 314 14. Ltd. RDI. ElectroChemiLuminescence (ECL). Available at:  
315 [https://diagnostics.roche.com/global/en/article-listing/electroChemiLuminescence-unique-](https://diagnostics.roche.com/global/en/article-listing/electroChemiLuminescence-unique-immunoassay-technology.html)  
316 [immunoassay-technology.html](https://diagnostics.roche.com/global/en/article-listing/electroChemiLuminescence-unique-immunoassay-technology.html).
- 317 15. Larremore DB, Fosdick BK, Zhang S, Grad YH. Jointly modeling prevalence, sensitivity and specificity  
318 for optimal sample allocation. *bioRxiv* **2020**.
- 319 16. Larremore DB, Fosdick BK, Bubar KM, et al. Estimating SARS-CoV-2 seroprevalence and  
320 epidemiological parameters with uncertainty from serological surveys. *medRxiv* **2020**.
- 321 17. Gelman A, Carpenter B. Bayesian analysis of tests with unknown specificity and sensitivity. *medRxiv*  
322 **2020**.
- 323 18. Stan - Stan. Available at: <https://mc-stan.org/about/>. Accessed 25/7/2020 2020.
- 324 19. Curmei M, Ilyas A, Evans O, Steinhardt J. Estimating Household Transmission of SARS-CoV-2. *medRxiv*  
325 **2020**.
- 326 20. Pollán M, Pérez-Gómez B, Pastor-Barriuso R, et al. Prevalence of SARS-CoV-2 in Spain (ENE-COVID): a  
327 nationwide, population-based seroepidemiological study. *The Lancet* **2020**.
- 328 21. Nickbakhsh S, Ho A, Marques DF, McMenemy J, Gunson RN, Murcia PR. Epidemiology of seasonal  
329 coronaviruses: Establishing the context for COVID-19 emergence. *The Journal of Infectious Diseases*  
330 **2020**.

- 331 22. Li H, Wang S, Zhong F, et al. Age-dependent risks of Incidence and Mortality of COVID-19 in Hubei  
332 Province and Other Parts of China. *Frontiers in Medicine* **2020**; 7:190.
- 333 23. Clark A, Jit M, Warren-Gash C, et al. Global, regional, and national estimates of the population at  
334 increased risk of severe COVID-19 due to underlying health conditions in 2020: a modelling study. *The*  
335 *Lancet Global Health* **2020**; 8:e1003-e17.
- 336 24. Shakiba M, Nazari SSH, Mehrabian F, Rezvani SM, Ghasempour Z, Heidarzadeh A. Seroprevalence of  
337 COVID-19 virus infection in Guilan province, Iran. *medRxiv* **2020**.
- 338 25. Delhi's sero-prevalence study finds 23.48 per cent people affected by COVID-19. *The Times of India*.  
339 Jul 22, 2020 ed. New Delhi, India, **2020**.
- 340 26. Bhattacharyya R, Bhaduri R, Kundu R, Salvatore M, Mukherjee B. Reconciling epidemiological models  
341 with misclassified case-counts for SARS-CoV-2 with seroprevalence surveys: A case study in Delhi, India.  
342 *medRxiv* **2020**.
- 343 27. Rubin R. Difficult to Determine Herd Immunity Threshold for COVID-19. *JAMA* **2020**; 324:732-.
- 344 28. He J, Guo Y, Mao R, Zhang J. Proportion of asymptomatic coronavirus disease 2019 (COVID-19): a  
345 systematic review and meta-analysis. *Journal of medical virology* **2020**.
- 346 29. Chatterjee S, Sarkar A, Chatterjee S, Karmakar M, Paul R. Studying the progress of COVID-19  
347 outbreak in India using SIRD model. *medRxiv* **2020**.
- 348 30. Metcalf CJE, Farrar J, Cutts FT, et al. Use of serological surveys to generate key insights into the  
349 changing global landscape of infectious disease. *The Lancet* **2016**; 388:728-30.
- 350 31. Hooper MW, Nápoles AM, Pérez-Stable EJ. COVID-19 and racial/ethnic disparities. *Jama* **2020**.
- 351 32. de Souza WM, Buss LF, da Silva Candido D, et al. Epidemiological and clinical characteristics of the  
352 COVID-19 epidemic in Brazil. *Nature Human Behaviour* **2020**:1-9.
- 353 33. Rafael RdMR, Neto M, Depret DG, Gil AC, Fonseca MHS, Souza-Santos R. Effect of income on the  
354 cumulative incidence of COVID-19: an ecological study. *Revista Latino-Americana de Enfermagem* **2020**;  
355 28.
- 356 34. Statistics GoPBo. Housing units by number of rooms and type Available at: [www.pbs.gov.pk](http://www.pbs.gov.pk).
- 357 35. Madewell ZJ, Yang Y, Longini Jr IM, Halloran ME, Dean NE. Household transmission of SARS-CoV-2: a  
358 systematic review and meta-analysis of secondary attack rate. *medRxiv* **2020**.

359

360



361 Table 1. General characteristics of the study participants

| Characteristics             | District East |             | District Malir |              |
|-----------------------------|---------------|-------------|----------------|--------------|
|                             | Phase 1       | Phase 2     | Phase 1        | Phase 2      |
|                             | (n= 500)      | (n= 500)    | (n= 500)       | (n= 504)     |
| Sex, male n (%)             | 256 (51.2%)   | 225 (45.0%) | 207 (41.4%)    | 199 (39.5%)  |
| Age in years , mean(SD)     | 26.2 (17.9)   | 25.9(16.7)  | 28.5 (17.9)    | 24.32 (16.7) |
| Age, categories, n (%)      |               |             |                |              |
| 0-4 year                    | 35 (7.0%)     | 22 (4.4%)   | 26 (5.2%)      | 33 (6.6%)    |
| 5-9 year                    | 57 (11.4%)    | 54 (10.8%)  | 52 (10.4%)     | 74 (14.7%)   |
| 10-18 year                  | 107 (21.4%)   | 139 (27.8%) | 86 (17.2%)     | 120 (23.9%)  |
| 19-39 year                  | 185 (37.0%)   | 170 (34.0%) | 203 (40.6%)    | 186 (37.0%)  |
| 40-59 year                  | 83 (16.6%)    | 97 (19.4%)  | 103 (20.6%)    | 65 (12.9%)   |
| 60 and above                | 33 ( 6.6%)    | 18 ( 3.6%)  | 30 ( 6.0%)     | 25 ( 5.0%)   |
| Household size, mean (SD)   | 6.1(4.17)     | 6.6(3.6)    | 6(2.8)         | 5.89(3.2)    |
| Working outside home, n (%) | 155 (31.0%)   | 145 (29.0%) | 143 (28.6%)    | 124 (24.6%)  |
| Comorbid, n (%)             |               |             |                |              |
| None                        | 453 (92.3%)   | 463 (93.0%) | 473 (94.6%)    | 479 (95.0%)  |
| Diabetes                    | 20 ( 4.0%)    | 14 ( 2.8%)  | 6 ( 1.2%)      | 10 ( 2.0%)   |
| Hypertension                | 14 (2.8%)     | 13 (2.6%)   | 16 (3.2%)      | 11 (2.2%)    |
| Asthma or Allergy           | 3 (0.6%)      | 3 (0.6%)    | 1 (0.2%)       | 0 (0.0%)     |
| Chronic Hepatitis           | 2 (0.4%)      | 3 (0.6%)    | 3 (0.6%)       | 3 (0.6%)     |
| Chronic Heart Disease       | 0 (0.0%)      | 3 (0.6%)    | 1 (0.2%)       | 1 (0.2%)     |
| Asymptomatic                | 435 (87.0%)   | 453 (90.6%) | 472 (94.4%)    | 487 (96.6%)  |

|                                                   |           |           |           |           |
|---------------------------------------------------|-----------|-----------|-----------|-----------|
| Sought care                                       | 9 ( 1.8%) | 9 ( 1.8%) | 3 ( 0.6%) | 4 ( 0.8%) |
| Hospitalization                                   | 1 ( 0.2%) | 5 ( 1.0%) | 1 ( 0.2%) | 0 ( 0.0%) |
| History of Travel                                 | 2 (0.4%)  | 11 (2.2%) | 8 ( 1.6%) | 1 ( 0.2%) |
| Contact with suspected or confirmed COVID-19 case | 1 ( 0.2%) | 1 (0.2%)  | 0 ( 0.0%) | 1 ( 0.2%) |

362

363

364 Figure 1. Study sites.

365 Figure 2 Panel A. Flow chart of participants in the phase 1 of study

366 Figure 2 Panel B. Flow chart of participants in the phase two of study

367 Figure 3: Prevalence estimates by age and gender based on the data from the second survey. The  
368 circle represents the posterior mean seroprevalence and the bar represents the 95% equal-tailed  
369 credible interval. Posterior mean estimates for District East are consistently greater than those  
370 for District Malir, although there is significant overlap in the credible intervals for all age and  
371 gender subpopulations. No consistent patterns exist between the prevalence rates for males and  
372 females.

373

374

375

376

**Figure 1.** Study area and total population

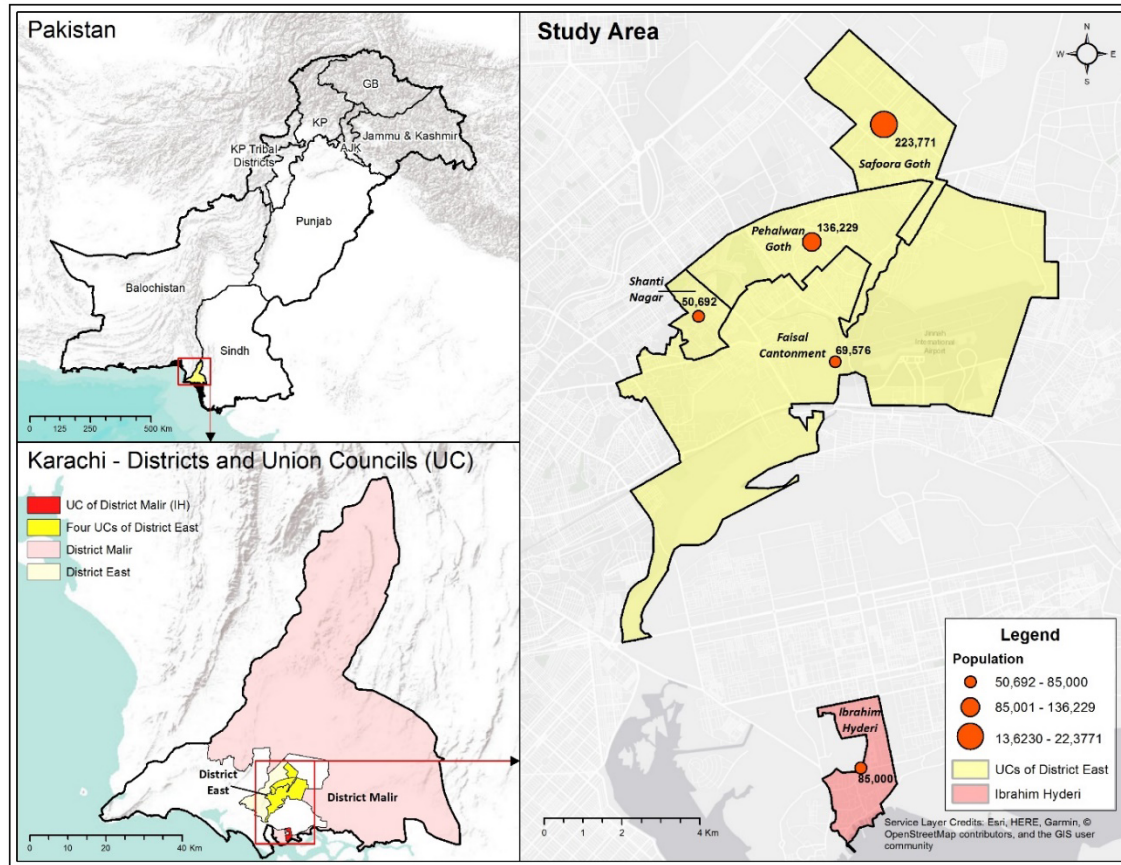

Figure 2 Panel A: Flow chart of participants in phase 1 of study.

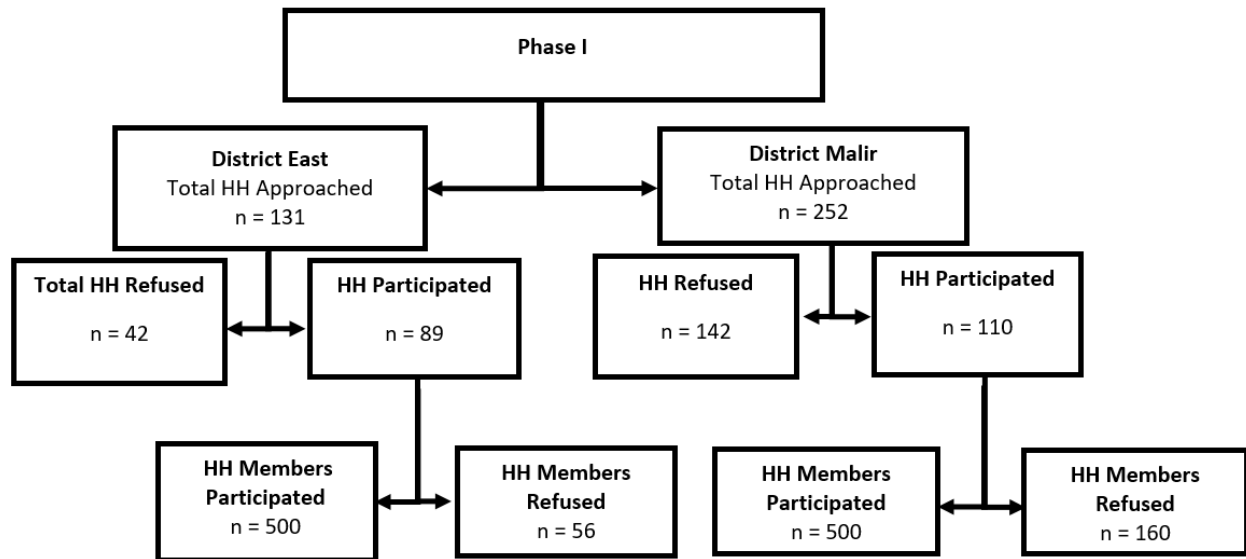

Figure 2 Panel B. Flow chart of participants in phase 2 of study

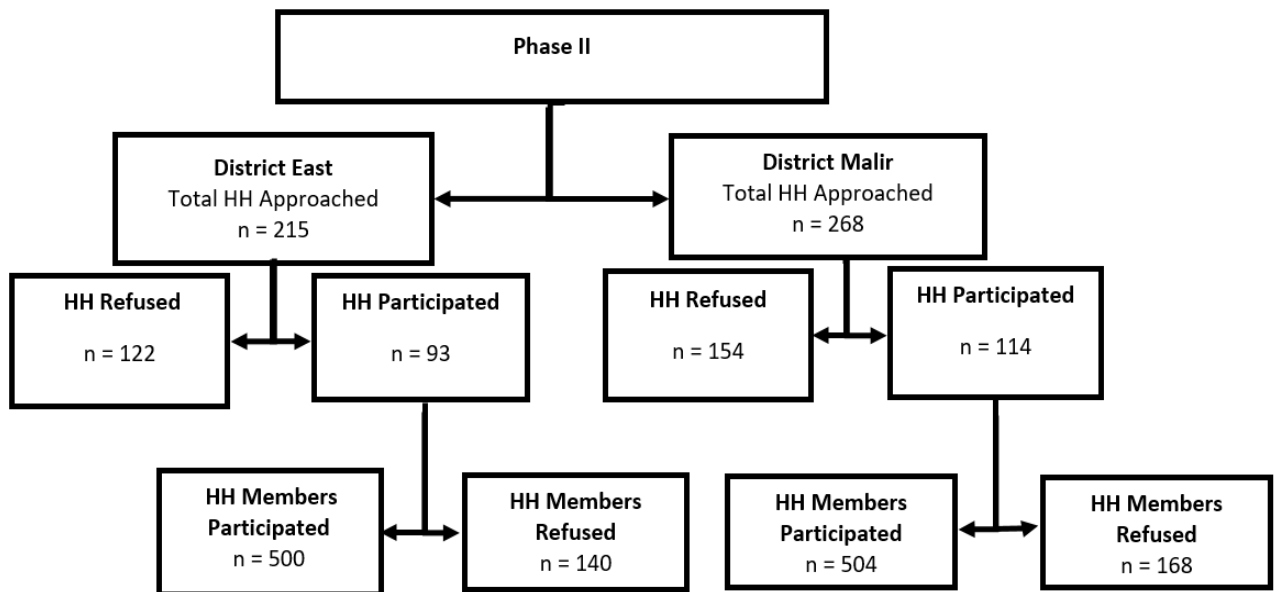

Figure 4: Age and Gender based prevalence of COVID-19 infection in District East and District Malir

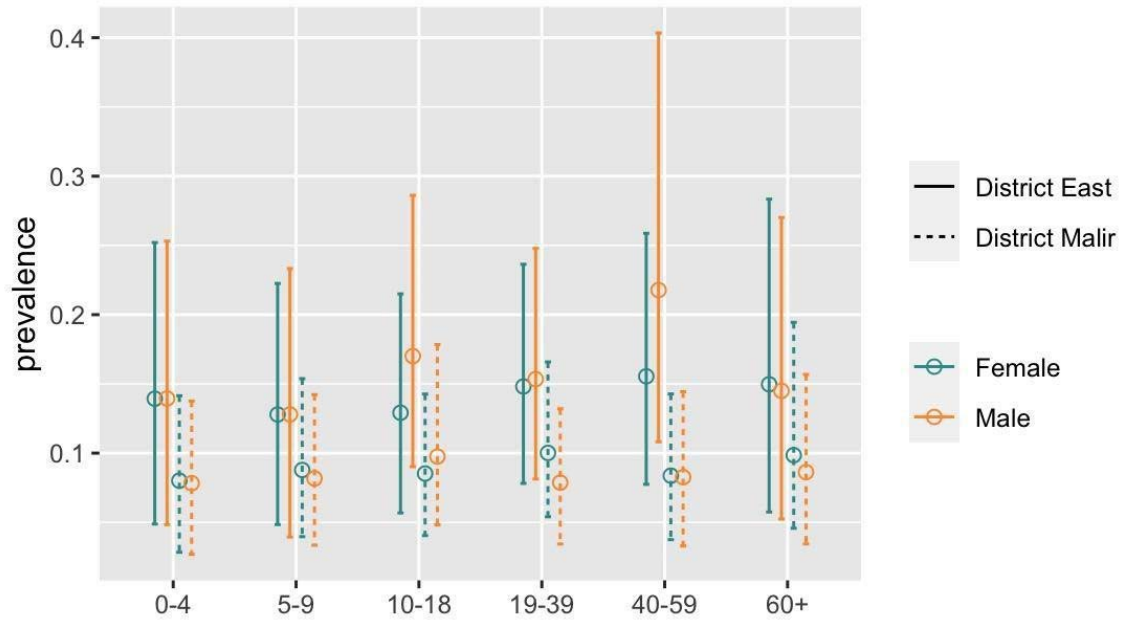

Source: https://medrxiv.org/content/10.1101/2020.07.28.20163451v3.full.pdf
