# Supplementary material for: Serial population-based sero-surveys for COVID-19 in low and high transmission neighborhoods of urban Pakistan
Source: bioRxiv or medRxiv preprint supplement (doi:10.1101/2020.07.28.20163451), 2020-12-28
Supplement: Supplementary file [file 2020.07.28.20163451-2.pdf]

# Karachi analysis

7/15/2020

## Summary of results

| Area           | Area/Wave ID | Sample size | # positive | # households |
|----------------|--------------|-------------|------------|--------------|
| Gulshan Town   | 91           | 500         | 2          | 89           |
| Ibrahim Hyderi | 92           | 500         | 0          | 110          |
| Gulshan Town   | 291          | 500         | 100        | 93           |
| Ibrahim Hyderi | 292          | 504         | 64         | 114          |

## Evidence of household transmission

In the Curmei et al. paper “Estimating Household Transmission of SARS-CoV-2”, they discuss three metrics of household transmission: intra-household reproduction number ( $R_h$ ), household secondary attack rate (SAR) and household conditional risk of infection (CRI). These quantities are defined below:

- The **intra-household reproductive number** ( $R_h$ ) is the average number of new infections caused by an infected individual inside their household.
- The **household secondary attack rate (SAR)** is the probability an infected person infects a specific household member.
- The **household conditional risk of infection (CRI)** is the probability that an individual in the household is infected, given another household member is infected.

The first two measures require information about actual transmission (attribution) within households, which we do not have. However, the CRI is estimatable using data from a single time point.

Below are estimates of CRI based on the second wave of data for each area, along with 95% bootstrap confidence intervals.

| Area | Estimate | 95% lower bd | 95% upper bd |
|------|----------|--------------|--------------|
| 291  | 0.410    | 0.277        | 0.515        |
| 292  | 0.312    | 0.155        | 0.466        |

Now we partition households into those with at least one symptomatic individual and those without any. The formula for CRI only involves households with at least one seropositive individual. In the table below, I include the number of such households involved in each calculation. Interestingly, for GT, the estimate of CRI is higher in households without any symptomatic individuals, while in HI the estimate of CRI is higher in households with a symptomatic individual. Note that in this calculation, a household was classified as “symptomatic” if it contained at least one individual who reported feeling symptoms, regardless of whether that individual was seropositive or seronegative.

| Symptoms? | Area | Num + households | Estimate | 95% lower bd | 95% upper bd |
|-----------|------|------------------|----------|--------------|--------------|
| symp      | 291  | 11               | 0.378    | 0.195        | 0.549        |
| symp      | 292  | 7                | 0.581    | 0.154        | 0.826        |
| no symp   | 291  | 34               | 0.438    | 0.259        | 0.582        |
| no symp   | 292  | 32               | 0.227    | 0.102        | 0.366        |

### Estimating overall seroprevalence

We fit a Bayesian multilevel regression model and perform poststratification to obtain an overall estimate of seroprevalence in each area. We directly model the lab data reported by Roche for the Elecsys<sup>®</sup> Anti-SARS-CoV-2 assay to account for uncertainty in the test accuracy. We fit the model *separately* to the data from Gulshan Town and that from Ibrahim Hyderi and only consider the data from wave 2 since the number of positive tests were extremely low in wave 1.

**Lab data:** We include the results from all 5272 negative controls run by Roche (of which 5262 were negative) and include the results from the 88 positive control samples that were at least a week post PCR confirmation (of which 81 were positive). We omit the 116 samples run 0-6 days post PCR confirmation as it is probably fair to assume most of the seropositive individuals sampled are at least 7 days post PCR confirmed. In addition, we omit the results from the 20 positive and 20 negative controls run specifically for this study since these were not run to estimate sensitivity and specificity, but rather to simply verify the lab procedure.

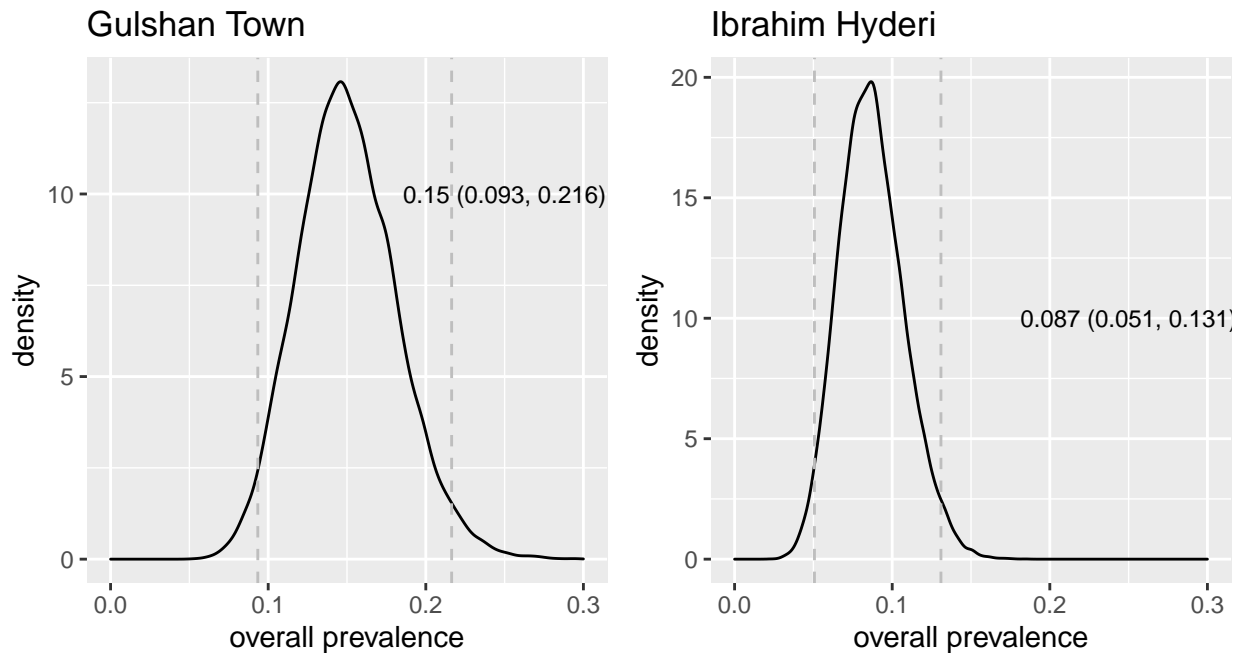

# Prevalence estimates by age/sex

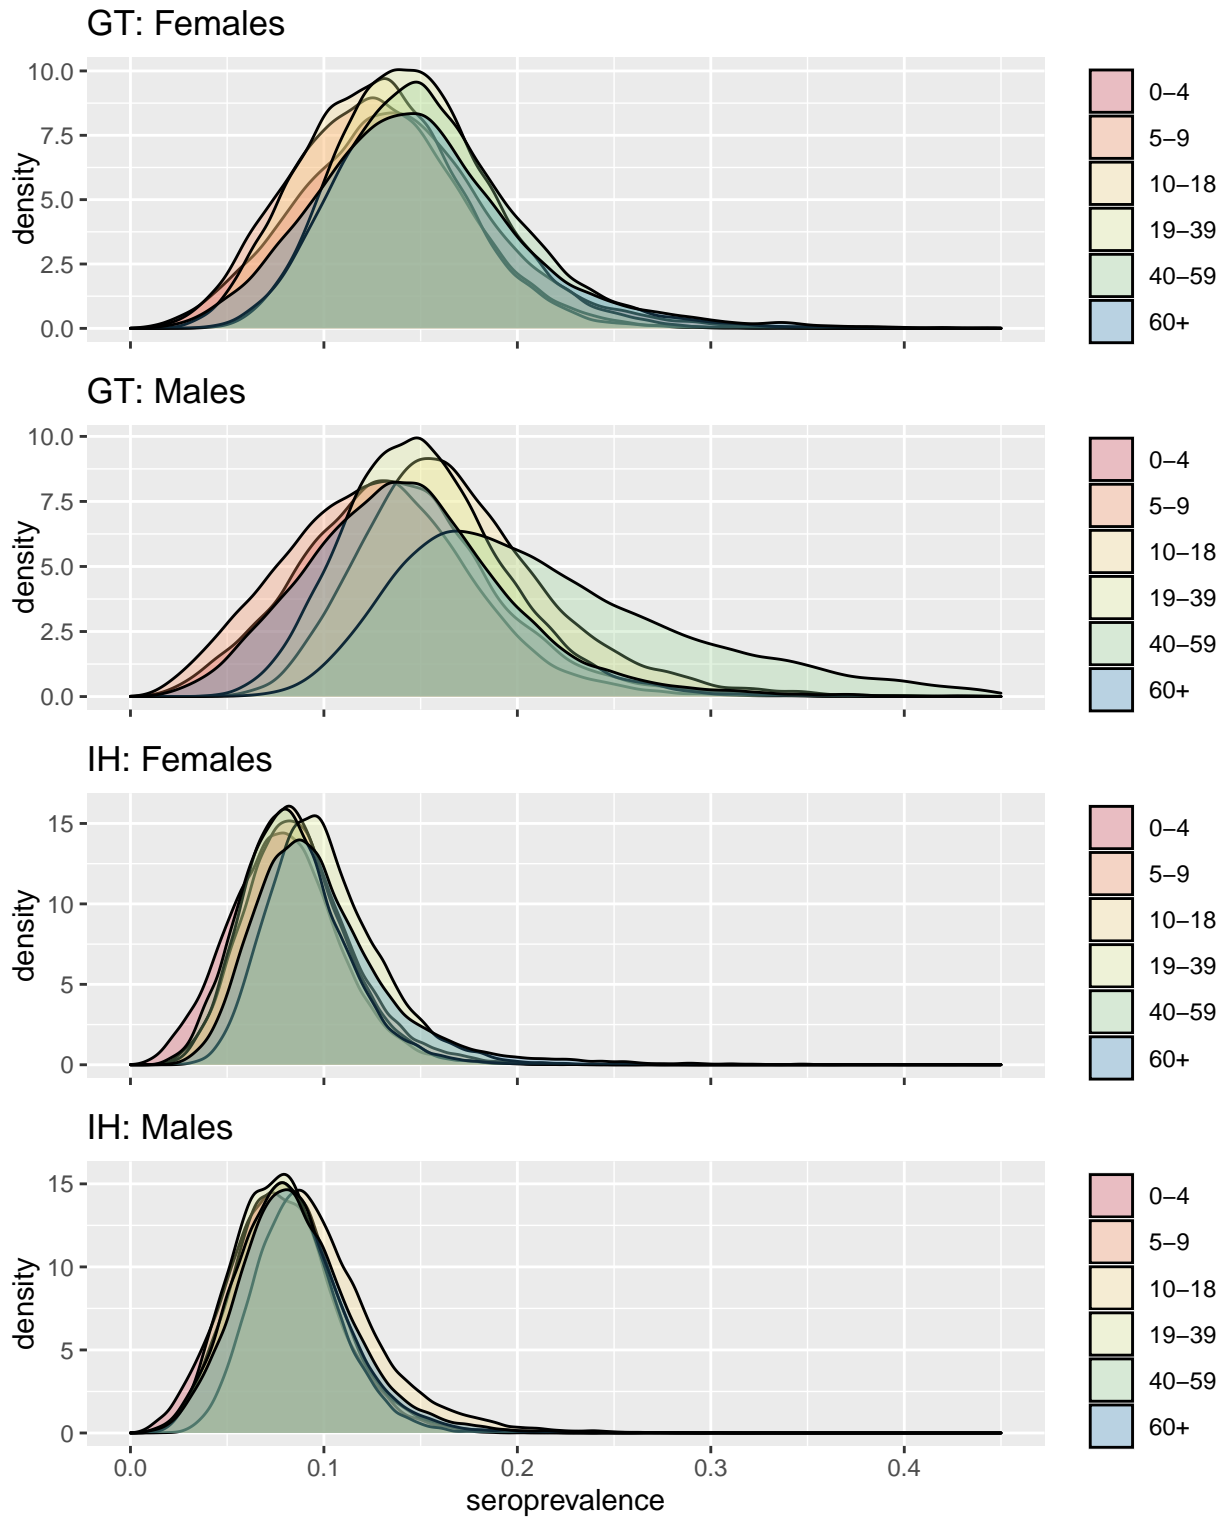

Below is a plot of the posterior mean estimates, along with 95% credible intervals for each gender/age group.

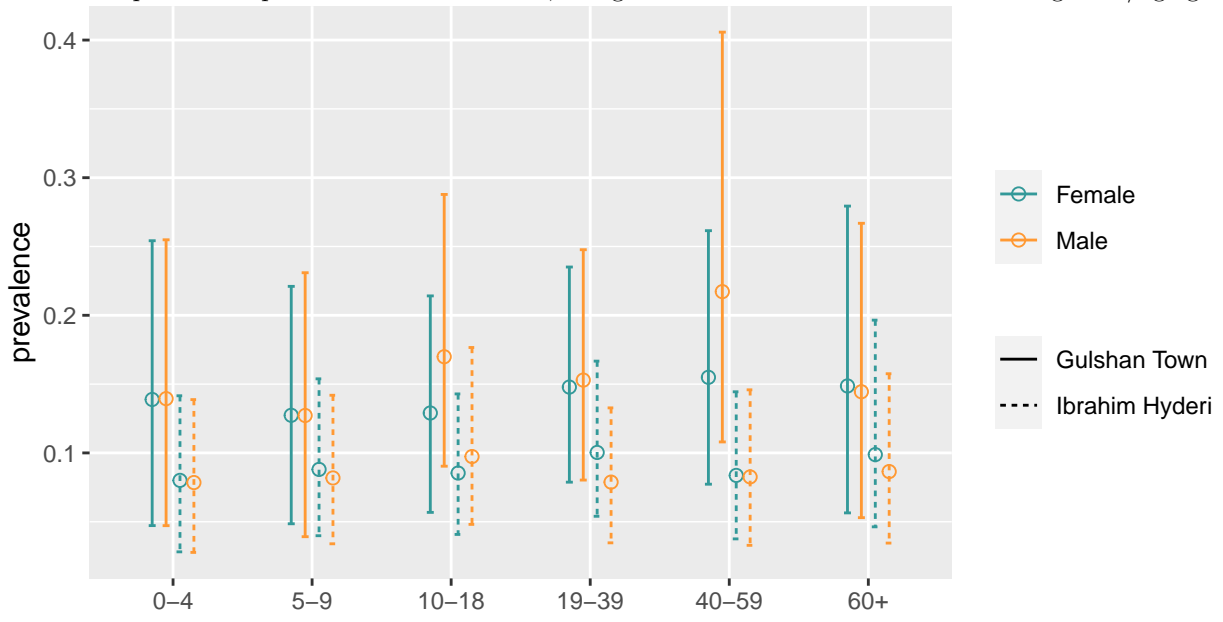

Table 4: Gulshan Town

| Gender | Age   | Prevalence | 95% lower bd | 95% upper bd |
|--------|-------|------------|--------------|--------------|
| Female | 0-4   | 0.139      | 0.047        | 0.254        |
| Female | 5-9   | 0.127      | 0.049        | 0.221        |
| Female | 10-18 | 0.129      | 0.057        | 0.214        |
| Female | 19-39 | 0.148      | 0.079        | 0.235        |
| Female | 40-59 | 0.155      | 0.077        | 0.261        |
| Female | 60+   | 0.149      | 0.056        | 0.279        |
| Male   | 0-4   | 0.139      | 0.047        | 0.255        |
| Male   | 5-9   | 0.127      | 0.039        | 0.231        |
| Male   | 10-18 | 0.170      | 0.090        | 0.288        |
| Male   | 19-39 | 0.153      | 0.080        | 0.248        |
| Male   | 40-59 | 0.217      | 0.108        | 0.406        |
| Male   | 60+   | 0.144      | 0.053        | 0.267        |

Table 5: Ibrahim Hyderi

| Gender | Age   | Prevalence | 95% lower bd | 95% upper bd |
|--------|-------|------------|--------------|--------------|
| Female | 0-4   | 0.080      | 0.028        | 0.142        |
| Female | 5-9   | 0.088      | 0.040        | 0.154        |
| Female | 10-18 | 0.085      | 0.041        | 0.143        |
| Female | 19-39 | 0.100      | 0.054        | 0.167        |
| Female | 40-59 | 0.084      | 0.038        | 0.144        |
| Female | 60+   | 0.099      | 0.046        | 0.196        |
| Male   | 0-4   | 0.078      | 0.028        | 0.139        |
| Male   | 5-9   | 0.082      | 0.034        | 0.142        |
| Male   | 10-18 | 0.097      | 0.048        | 0.177        |
| Male   | 19-39 | 0.079      | 0.035        | 0.133        |
| Male   | 40-59 | 0.083      | 0.033        | 0.146        |
| Male   | 60+   | 0.086      | 0.034        | 0.158        |

## Estimate difference between prevalence by gender

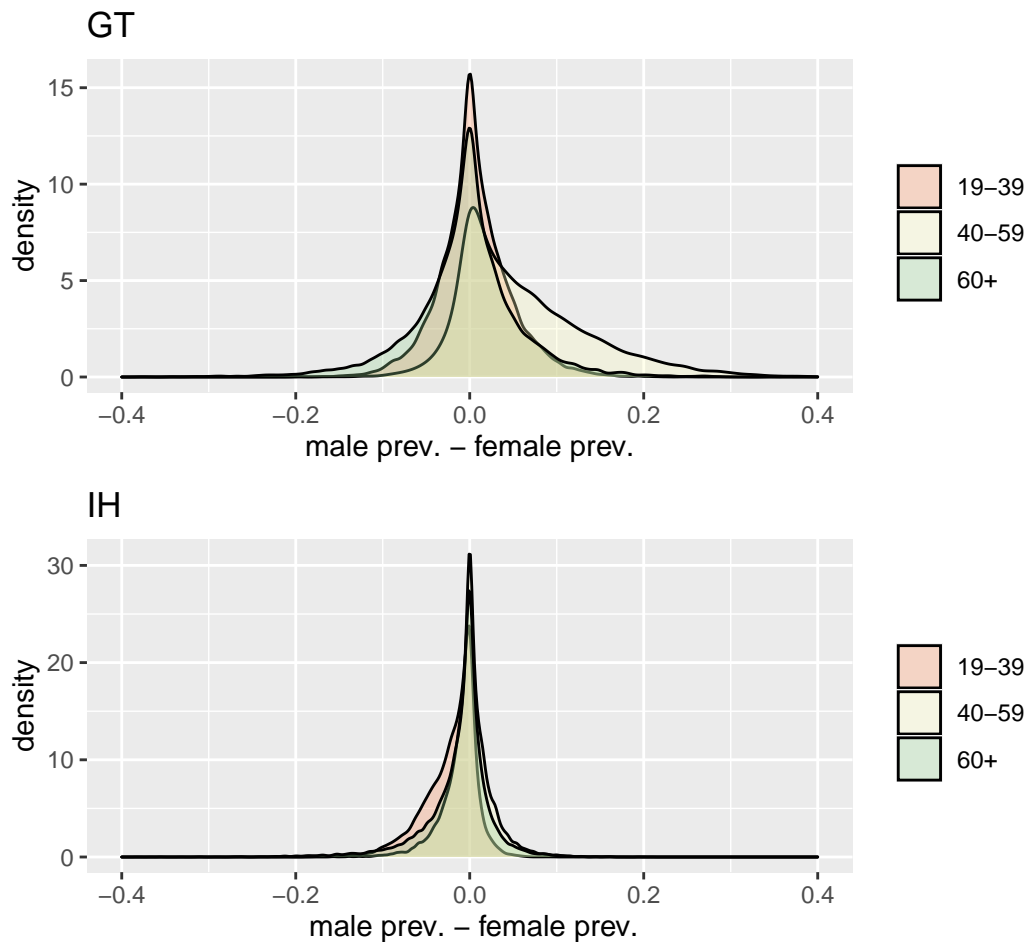

Above are the posterior distributions for the difference between male and female prevalence for the adult age groups. Notice that they are mostly centered on zero indicating there is not evidence of a significant difference between genders.

## Bayesian hierarchical model

### Model for field data

Let  $y_i$  denote the test outcome of individual  $i$ . We model  $y_i$  as Bernoulli where probability the individual is seropositive is  $\pi_i$  and the probability the individual tests positive is  $p_i$ . Given a perfect diagnostic test,  $p_i = \pi_i$ , however we know there is non-zero probability of observing a false positive and false negative. Thus,

$$p_i = \pi_i * se + (1 - \pi_i) * (1 - sp)$$

where  $se$  is the true sensitivity and  $sp$  is the true specificity of the test.

Recognizing that seroprevalence may vary by sex and age, we consider the following logistic regression model:

$$\pi_i = \text{logit}^{-1}(\beta_1 + \alpha_{ag[i]}^{ag} + \alpha_{hh[i]}^{hh})$$

where  $ag[i]$  indexes which age/gender group person  $i$  belongs, and  $hh[i]$  indexes which household person  $i$  belongs.

As in Gelman and Carpenter (2020), we place a uniform(0,1) prior distribution on the probability that an average person is positive by specifying a unit logistic prior for the intercept  $\beta_1$ . The effects for age/gender and household have hierarchical priors

$$\alpha_j^{ag} \sim \text{normal}(0, \sigma^{ag})$$

$$\alpha_k^{hh} \sim \text{normal}(0, \sigma^{hh})$$

where  $\sigma^{ag}$  and  $\sigma^{hh}$  are modeled using a normal<sup>+</sup>(0, 0.5).

### Model for lab data

Notice that the model above requires knowledge of the true sensitivity and specificity. Instead of estimating these quantities and pretending they are known exactly, we directly model the lab validation data provided by Roche for the Elecsys<sup>®</sup> Anti-SARS-CoV-2 assay.

In general, consider a  $n_{se}$  positive control samples of which  $y_{se}$  test positive and  $n_{sp}$  negative control samples of which  $y_{sp}$  correctly test negative. We can model these results as binomial outcomes:

$$y_{se} \sim \text{binomial}(n_{se}, se)$$

$$y_{sp} \sim \text{binomial}(n_{sp}, sp)$$

We specify uniform(0,1) priors on the sensitivity  $se$  and specificity  $sp$  parameters.
